# Supplementary material for: Persistence of tumor necrosis factor inhibitor or conventional synthetic disease-modifying antirheumatic drug monotherapy or combination therapy in psoriatic arthritis in a real-world setting
Source: Springer Nature journal article supplement (doi:10.1007/s00296-019-04345-1), 2019-07-18
Supplement: MOESM1 [file 16961384]

**APPENDIX**

**Other Registry Analyses Examining Treatment Persistence in Psoriatic Arthritis**

Although a systematic review of previous studies was beyond the scope of this work, examination of previous studies of treatment persistence in registries of psoriatic arthritis (PsA) patients provides useful context. Studies described in this appendix were identified from a PubMed search with the terms “psoriatic arthritis” and “registry”. Additional studies were identified from the bibliographies of the articles identified by the initial search.

One identified study described a pooled analysis of data from 5 European registries of adults with psoriasis. This study included 912 patients who received combination therapy with a biologic and either a conventional synthetic disease-modifying antirheumatic drug (csDMARD) or phototherapy [1]. Overall, 57% of patients in the pooled analysis had PsA. In the studies cited in that review, 1-year persistence rates for combination therapy with a biologic and methotrexate ranged from 28% to 83% in the 3 studies that had a majority of PsA patients and from 53% to 92% in the 2 studies that had a minority of PsA patients. Those results showed the importance of examining treatment patterns specifically in a cohort of PsA patients, as we did in our analysis. A separate analysis of 420 PsA patients in an Italian rheumatology registry reported that female sex, disease duration, and infliximab use (vs etanercept) predicted treatment discontinuation for a new tumor necrosis factor inhibitor (TNFi) therapy [2]. Another analysis of the Italian registry reported similar results for the female sex among PsA patients overall, with significantly higher 2-year persistence for etanercept (68%) than adalimumab (52%; p = 0.01) in the subset of patients with polyarticular PsA, whereas in oligoarticular PsA, no significant difference was detected [3]. Other analyses of data from Italian registries of PsA patients examined treatment discontinuation only for golimumab [4] or ustekinumab [5].

Other examinations of TNFi treatment patterns and predictors of persistence used data from patients in the British Society for Rheumatology Biologics Register, which was designed to include rheumatoid arthritis patients but also enrolled PsA patients for a few years [6,7]. The study included 625 PsA patients in the registry who had no prior TNFi therapy. Persistence rates at 3, 5, and 8 years were 61%, 47%, and 33%, respectively. Reasons for discontinuing the first TNFi were evenly divided between lack of efficacy, adverse events, and other/unknown causes. Patients who were female, had at least 1 major comorbid condition, or received infliximab were significantly more likely to be nonpersistent on the first TNFi therapy. A majority of patients received a second or third TNFi after discontinuation of the first TNFi; only 10% of patients were not on biologic treatment at 8 years.

A series of analyses of the DANBIO registry of rheumatology patients in Denmark reported that sex and disease activity may influence TNFi therapy persistence in PsA patients, but the specific TNFi or the dose does not predict treatment discontinuation. Among 764 PsA patients in DANBIO who received TNFi therapy, the 1-year and 2-year treatment persistence rates were 70% and 57%, respectively [8]. Significant predictors for discontinuation of TNFi treatment were female sex, global disease severity score, low C-reactive protein (CRP), and no methotrexate use. Other factors such as the specific TNFi, Health Assessment Questionnaire (HAQ) score, or Disease Activity Score from 28 joints (DAS28) did not predict treatment discontinuation. An examination of sex differences for treatment outcomes in the DANBIO registry reported that median treatment persistence for TNFi therapy in PsA patients was 1.44 years for women and 3.83 years for men, resulting in a hazard ratio of 1.52 (95% confidence interval, 1.23–1.89; p < 0.001) for treatment withdrawal in women vs men [9]. In another DANBIO analysis, patients with 0, 1, and 2 or more comorbid conditions at the start of TNFi therapy had median persistence times of 2.6 years, 2.2 years, and 1.3 years, respectively (p < 0.001) [10]. A pooled analysis of data from DANBIO and a similar registry in Iceland (ICEBIO) reported that the starting dose of infliximab did not predict treatment discontinuation or persistence [11].

Similar results were obtained in other Scandinavian registries. Data from 765 PsA patients in the National Register for Biologic Treatment in Finland (ROB-FIN) showed that 20% of patients discontinued TNFi therapy within the first year and 28% discontinued within the first 2 years [12]. The risk of treatment discontinuation was significantly greater for infliximab than for adalimumab, and it tended to be greater for infliximab than for etanercept or golimumab. In the Norwegian DMARD (NOR-DMARD) registry analysis of 1268 patients receiving TNFi, including 847 with rheumatoid arthritis, 172 with PsA, and 249 with ankylosing spondylitis, 1-year treatment persistence rates by condition were 65%, 77%, and 78%, respectively (p = 0.003 for rheumatoid arthritis vs PsA, and p = 0.001 for rheumatoid arthritis vs ankylosing spondylitis) [13]. As was shown in the DANBIO analyses, female sex and higher baseline disease activity were associated with a higher risk of TNFi therapy discontinuation, whereas concomitant methotrexate use was associated with a lower risk of TNFi therapy discontinuation. In the South Swedish Arthritis Treatment Group registry, better TNFi treatment persistence was again seen among the PsA patients with concomitant methotrexate, etanercept, or high CRP levels at treatment initiation [14]. An analysis of data from 4903 patients in the Swedish Prescribed Drug Register, including 898 PsA patients, reported that median persistence on TNFi therapy among the PsA patients was 16.0 months for first-line therapy and 11.1 months for second-line therapy [15].

None of the registry analyses described above examined treatment patterns among patients in the United States, where biologic treatment patterns may be different from those in other countries. In an analysis of a different Corrona registry of rheumatology patients, a subset of PsA patients was examined to compare treatment persistence between TNFi monotherapy and TNFi/csDMARD combination therapy [16]. Treatment persistence did not differ significantly overall between TNFi monotherapy and combination therapy. Higher baseline HAQ and Clinical Disease Activity Index (CDAI) scores were significant predictors of treatment persistence.

Another analysis divided the Corrona rheumatology registry into 3 periods (2004–2006, 2007–2009, and 2010–2012) and examined treatment patterns for monotherapy or combination therapy in each period [17]. One-year treatment persistence rates across the cohorts generally ranged from 52% to 71%, with lower values for methotrexate monotherapy (34%) or combination therapy (36%) in the period of 2010–2012.

A third analysis of the Corrona rheumatology registry included a subset of PsA patients with 325 discontinuations of TNFi therapy (54% with monotherapy, 42% with methotrexate, and 7% with prednisone) when they had low disease activity (Clinical Disease Activity Index score ≤ 10 and physician global skin assessment ≤ 20 of 100) [18]. The mean duration of TNFi therapy at the time of discontinuation was 1.5 ± 1.6 years. Loss of clinical benefit occurred after 45% of TNFi therapy discontinuations, at a median of 29 months after the discontinuation. That study did not examine treatment patterns and outcomes for csDMARD therapy. Conversely, an examination of clinical outcomes after treatment discontinuation was beyond the scope of our analysis. Future studies could combine the 2 approaches to examine whether there are differences in clinical outcomes between PsA patients who discontinue either TNFi or csDMARD therapy for PsA and those who persist on therapy.

The most recent analysis of PsA patients in the Corrona rheumatology registry included 1241 PsA patients who initiated TNFi therapy and used Cox proportional hazards models to identify factors associated with TNFi nonpersistence through 4 years of follow-up [19]. After initiating TNFi therapy, patients with no prior TNFi use were more likely than patients with a prior history of TNFi use to be persistent on the index therapy at each post-index assessment from 6 months (87% vs 80%) through 48 months (42% vs 31%). The mean time to nonpersistence was 32 months vs 23 months for no prior use of TNFi therapy vs prior use of TNFi therapy, respectively. In the Cox proportional hazards model, moderate and high disease activities based on CDAI and disease duration were associated with persistence for both subgroups, and use of prior medications or skin disease was associated with persistence for patients with a prior history of TNFi use.

The Corrona PsA/spondyloarthritis (SpA) registry was established to understand the epidemiology and natural history of these conditions, including comorbidities, prescribing practices, and comparative effectiveness in a real-world setting in the United States. As additional data become available from the Corrona PsA/SpA registry, it may be possible to conduct analyses of longer-term treatment patterns, predictors for treatment persistence, and clinical outcomes after treatment persistence or treatment discontinuation, such as those described above for other registries.

# APPENDIX References

1. Busard CI, Cohen AD, Wolf P, Gkalpakiotis S, Cazzaniga S, Stern RS, Hutten BA, Feldhamer I, Quehenberger F, Lichem R, Kojanova M, Adenubiova E, Addis A, Naldi L, Spuls PI (2018) Biologics combined with conventional systemic agents or phototherapy for the treatment of psoriasis: real-life data from PSONET registries. J Eur Acad Dermatol Venereol 32 (2):245-253. https://doi.org/10.1111/jdv.14583

2. Iannone F, Lopriore S, Bucci R, Lopalco G, Chiala A, Cantarini L, Lapadula G (2016) Longterm clinical outcomes in 420 patients with psoriatic arthritis taking anti-tumor necrosis factor drugs in real-world settings. J Rheumatol 43 (5):911-917. https://doi.org/10.3899/jrheum.151042

3. Iannone F, Lopriore S, Bucci R, Scioscia C, Anelli MG, Notarnicola A, Lapadula G (2015) Two-year survival rates of anti-TNF-alpha therapy in psoriatic arthritis (PsA) patients with either polyarticular or oligoarticular PsA. Scand J Rheumatol 44 (3):192-199. https://doi.org/10.3109/03009742.2014.962081

4. Iannone F, Santo L, Anelli MG, Bucci R, Semeraro A, Quarta L, D'Onofrio F, Marsico A, Carlino G, Casilli O, Cacciapaglia F, Zuccaro C, Falappone PC, Cantatore FP, Muratore M, Lapadula G (2017) Golimumab in real-life settings: 2 years drug survival and predictors of clinical outcomes in rheumatoid arthritis, spondyloarthritis, and psoriatic arthritis. Semin Arthritis Rheum 47 (1):108-114. https://doi.org/10.1016/j.semarthrit.2017.01.008

5. Iannone F, Santo L, Bucci R, Semeraro A, Carlino G, Paoletti F, Quarta L, Leucci P, Zuccaro C, Marsico A, Scioscia C, D'Onofrio F, Mazzotta D, Muratore M, Cantatore FP, Lapadula G (2018) Drug survival and effectiveness of ustekinumab in patients with psoriatic arthritis. Real-life data from the biologic Apulian registry (BIOPURE). Clin Rheumatol 37 (3):667-675. https://doi.org/10.1007/s10067-018-3989-2

6. Fagerli KM, Kearsley-Fleet L, Watson KD, Packham J, BSRBR-RA Contributors Group, Symmons DPM, Hyrich KL (2018) Long-term persistence of TNF-inhibitor treatment in patients with psoriatic arthritis. Data from the British Society for Rheumatology Biologics Register. RMD open 4 (1):e000596. https://doi.org/10.1136/rmdopen-2017-000596

7. Saad AA, Ashcroft DM, Watson KD, Hyrich KL, Noyce PR, Symmons DP (2009) Persistence with anti-tumour necrosis factor therapies in patients with psoriatic arthritis: observational study from the British Society of Rheumatology Biologics Register. Arthritis Res Ther 11 (2):R52. https://doi.org/10.1186/ar2670

8. Glintborg B, Ostergaard M, Dreyer L, Krogh NS, Tarp U, Hansen MS, Rifbjerg-Madsen S, Lorenzen T, Hetland ML (2011) Treatment response, drug survival, and predictors thereof in 764 patients with psoriatic arthritis treated with anti-tumor necrosis factor alpha therapy: results from the nationwide Danish DANBIO registry. Arthritis Rheum 63 (2):382-390. https://doi.org/10.1002/art.30117

9. Hojgaard P, Ballegaard C, Cordtz R, Zobbe K, Clausen M, Glintborg B, Kristensen LE, Dreyer L (2018) Gender differences in biologic treatment outcomes-a study of 1750 patients with psoriatic arthritis using Danish Health Care Registers. Rheumatology (Oxford) 57 (9):1651-1660. https://doi.org/10.1093/rheumatology/key140

10. Ballegaard C, Højgaard P, Dreyer L, Cordtz R, Jørgensen TS, Skougaard M, Tarp S, Kristensen LE (2018) Impact of comorbidities on tumor necrosis factor inhibitor therapy in psoriatic arthritis: a population-based cohort study. Arthritis Care Res (Hoboken) 70 (4):592-599. https://doi.org/10.1002/acr.23333

11. Glintborg B, Gudbjornsson B, Krogh NS, Omerovic E, Manilo N, Holland-Fischer M, Lindegaard HM, Loft AG, Nordin H, Johnsen L, Oeftiger SF, Hansen A, Rasmussen C, Grondal G, Geirsson AJ, Hetland ML (2014) Impact of different infliximab dose regimens on treatment response and drug survival in 462 patients with psoriatic arthritis: results from the nationwide registries DANBIO and ICEBIO. Rheumatology (Oxford) 53 (11):2100-2109. https://doi.org/10.1093/rheumatology/keu252

12. Aaltonen K, Heinonen A, Joensuu J, Parmanne P, Karjalainen A, Varjolahti-Lehtinen T, Uutela T, Puurtinen-Vilkki M, Arstila L, Blom M, Sokka T, Nordstrom D (2017) Effectiveness and drug survival of TNF-inhibitors in the treatment of psoriatic arthritis: a prospective cohort study. Semin Arthritis Rheum 46 (6):732-739. https://doi.org/10.1016/j.semarthrit.2016.09.005

13. Heiberg MS, Koldingsnes W, Mikkelsen K, Rodevand E, Kaufmann C, Mowinckel P, Kvien TK (2008) The comparative one-year performance of anti-tumor necrosis factor alpha drugs in patients with rheumatoid arthritis, psoriatic arthritis, and ankylosing spondylitis: results from a longitudinal, observational, multicenter study. Arthritis Rheum 59 (2):234-240. https://doi.org/10.1002/art.23333

14. Kristensen LE, Gulfe A, Saxne T, Geborek P (2008) Efficacy and tolerability of anti-tumour necrosis factor therapy in psoriatic arthritis patients: results from the South Swedish Arthritis Treatment Group register. Ann Rheum Dis 67 (3):364-369. https://doi.org/10.1136/ard.2007.073544

15. Svedbom A, Dalén J, Black CM, Kachroo S (2017) Persistence and costs with subcutaneous TNF-alpha inhibitors in immune-mediated rheumatic disease stratified by treatment line. Patient preference and adherence 11:95-106. https://doi.org/10.2147/PPA.S119808

16. Mease PJ, Collier DH, Saunders KC, Li G, Kremer JM, Greenberg JD (2015) Comparative effectiveness of biologic monotherapy versus combination therapy for patients with psoriatic arthritis: results from the Corrona registry. RMD open 1 (1):e000181. https://doi.org/10.1136/rmdopen-2015-000181

17. Mease PJ, Lesperance T, Liu M, Collier DH, Mason M, Deveikis S, Accortt NA (2017) Changes in treatment patterns in patients with psoriatic arthritis initiating biologic and nonbiologic therapy in a clinical registry. J Rheumatol 44 (2):184-192. https://doi.org/10.3899/jrheum.160343

18. Huynh DH, Boyd TA, Etzel CJ, Cox V, Kremer J, Mease P, Kavanaugh A (2017) Persistence of low disease activity after tumour necrosis factor inhibitor (TNFi) discontinuation in patients with psoriatic arthritis. RMD open 3 (1):e000395. https://doi.org/10.1136/rmdopen-2016-000395

19. Harrold LR, Stolshek BS, Rebello S, Collier DH, Mutebi A, Wade SW, Malley W, Greenberg JD, Etzel CJ (2017) Impact of prior biologic use on persistence of treatment in patients with psoriatic arthritis enrolled in the US Corrona registry. Clin Rheumatol 36 (4):895-901. https://doi.org/10.1007/s10067-017-3593-x
